# Supplementary material for: Optical Activity of Metal Nanoclusters Deposited on Regular and Doped Oxide Supports from First-Principles Simulations
Source: MDPI journal article supplement (doi:10.3390/molecules26226961), 2021-11-18
Supplement: s1 [file s1]

## Supplementary Materials

### Optical Activity of Metal Nanoclusters Deposited on Regular and Doped Oxide Supports from First-principles Simulations

Luca Sementa <sup>1,\*</sup>, Mauro Stener <sup>2,\*</sup>, Alessandro Fortunelli <sup>3,\*</sup>

<sup>1</sup> CNR- IPCF, Consiglio Nazionale delle Ricerche, 56124 Pisa, Italy

<sup>2</sup> Dipartimento di Scienze Chimiche e Farmaceutiche, Università di Trieste, I-34127 Trieste, Italy

<sup>3</sup> CNR-ICCOM, Consiglio Nazionale delle Ricerche, 56124 Pisa, Italy

\* Correspondence: luca.sementa@cnr.it (L.S.); stener@units.it (M.S.); alessandro.fortunelli@cnr.it (A.F.)

Here we present further information complementing that one provided in the main text.

We first furnish some details on the energetics of the structural models.

To help the reader understand details of our approach, we also provide pictorial illustrations of the finite-cluster models for the support and of the fragment systems.

We then give a comparison and cross-validation of the simulated TDDFT/PBE0 spectra, using different codes.

We finally include the Cartesian coordinates of the relaxed geometries here considered, so that the simulations can be reproduced by others.

Starting with the energetics of the structural models, we first report the adsorption energies of the clusters. Defining the adsorption energy  $E_{\text{ads}}(\text{M}_{20}/\text{MgO})$  of a  $\text{M}_{20}$  cluster onto the  $\text{MgO}(100)$  slab as:

$$E_{\text{ads}}(\text{M}_{20}/\text{MgO}) = E(\text{M}_{20}/\text{MgO}) - E(\text{M}_{20}) - E(\text{MgO}) \quad (\text{SM1})$$

where  $E(\text{M}_{20}/\text{MgO})$  is the total energy of the composite cluster-on- $\text{MgO}(100)$  system,  $E(\text{M}_{20})$  is the energy of the relaxed  $\text{M}_{20}$  cluster in the gas phase, and  $E(\text{MgO})$  is the energy of the  $\text{MgO}(100)$  slab, we find:  $E_{\text{ads}}(\text{Ag}_{20}/\text{MgO}) = 4.80$  eV,  $E_{\text{ads}}(\text{Au}_{20}/\text{MgO}) = 5.95$  eV. Using analogous definitions, for the  $\text{MgO}(100)$ -Ovac defected support we find:  $E_{\text{ads}}(\text{Ag}_{20}/\text{MgO-Ovac}) = 5.82$  eV,  $E_{\text{ads}}(\text{Au}_{20}/\text{MgO-Ovac}) = 8.36$  eV. In these values, the D3-estimated dispersion component is  $\approx 3.13$  eV for the Ag systems and  $\approx 3.32$  eV for the Au systems, respectively. These values of adsorption energies are sizeable, but are not sufficient to perturb the tough  $\text{MgO}(100)$  support significantly, as we showed in previous work by comparison of these finite-cluster simulations with the results of periodic systems in which the support was

allowed to relax [1,2]. It can also be recalled (see Figure S3) that the structural deformation induced by the interaction with the support does not change appreciably the spectrum of the free clusters. All this justifies the choice of our structural model.

1. Barcaro, G.; Fortunelli, A. The Interaction of Coinage Metal Clusters with the MgO(100) Surface. *J. Chem. Theory Comput.*, **2005**, *1*, 972–985, DOI: 10.1021/ct050073e.
2. Barcaro, G.; Edoardo Aprà, E.; Fortunelli, A. Structure of Ag Clusters Grown on F<sub>s</sub>-Defect Sites of an MgO(100) Surface. *Chem. Eur. J.*, **2007**, *13*, 6408–6418, DOI: 10.1002/chem.200601796.

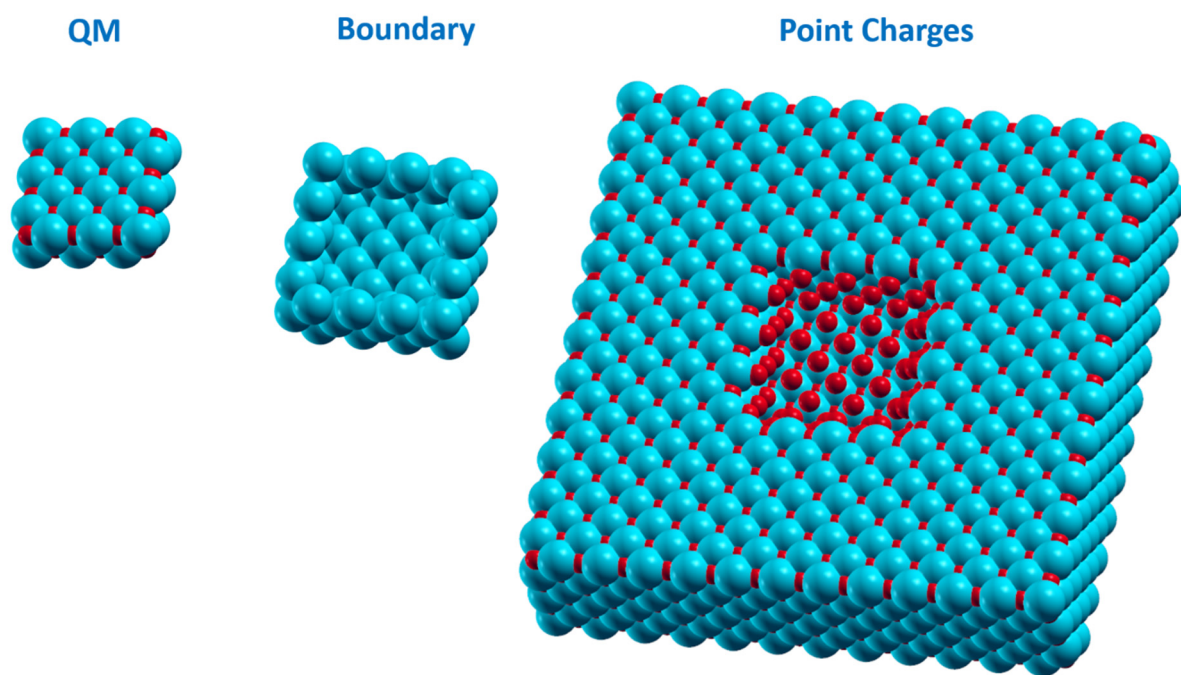

**Figure S1.** Pictorial illustration of the decomposition of the finite-cluster model used to model the substrate, including explicitly QM atoms (QM), pseudopotential or simplified  $\text{Mg}^{2+}$  cations (Boundary), and point charges (Point Charges).

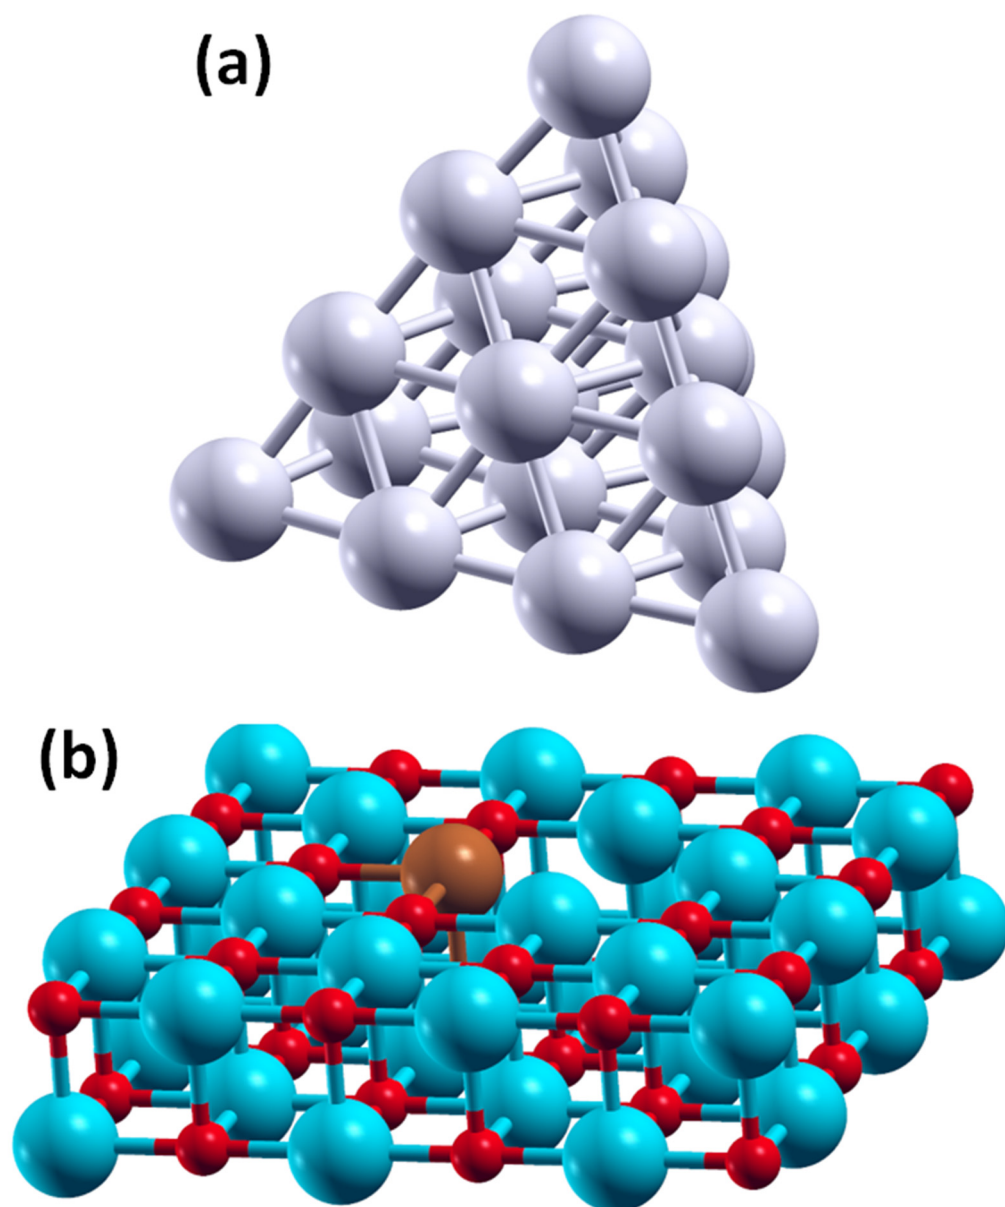

**Figure S2.** Representative geometries of the fragment systems (see Section 2.1 of the main text): (a)  $\text{Ag}_{20}$ , and (b) the QM model of  $\text{MgO}(100)$  with a  $\text{Mg}^{2+} \rightarrow \text{Cu}^{2+}$  replacement next to an oxygen vacancy (color coding: oxygen in red, magnesium in light blue, copper in brown).

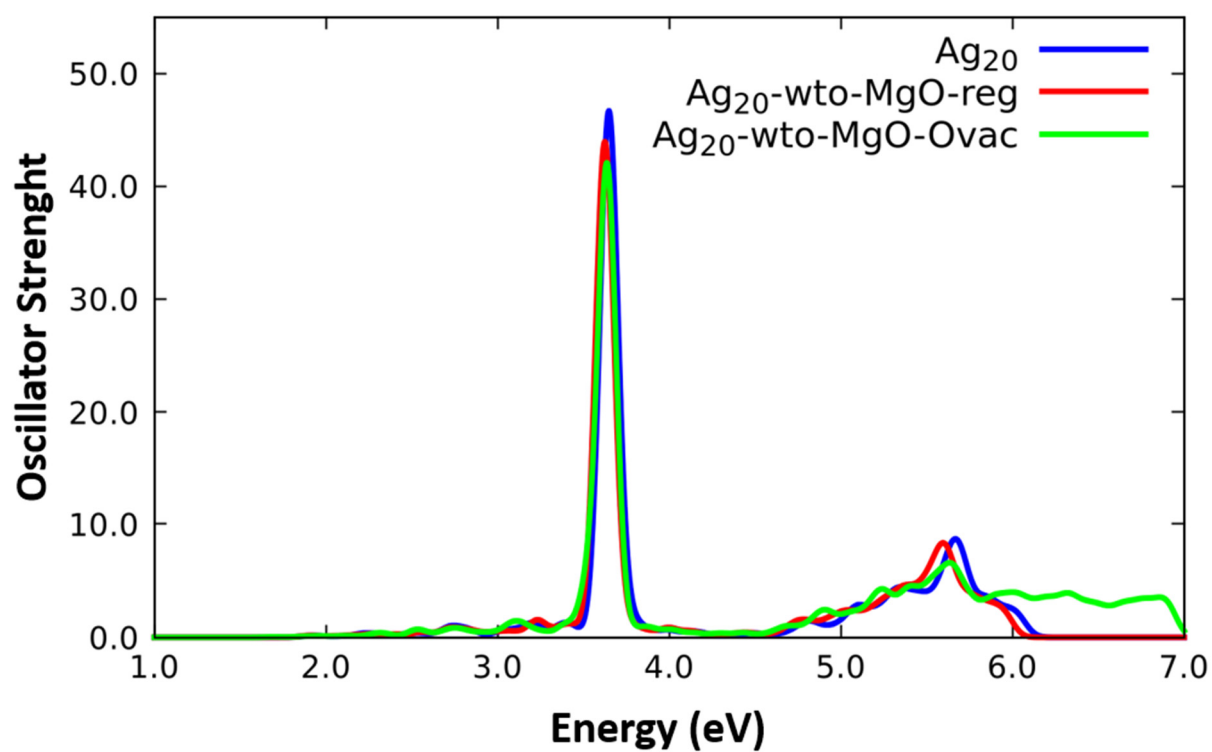

**Figure S3.** Simulated TDDFT/PBE0 spectrum of  $\text{Ag}_{20}$  in various geometries: gas-phase (blue curve), extracted from the  $\text{Ag}_{20}/\text{MgO}(100)$ -reg interacting system (red curve), and extracted from the  $\text{Ag}_{20}/\text{MgO}(100)$ -Ovac interacting system (green curve).

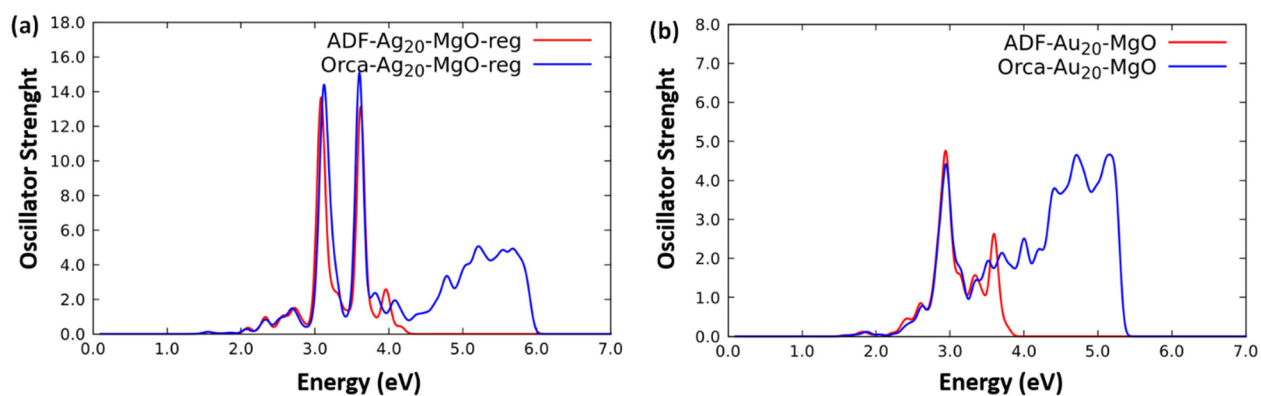

**Figure S4.** Comparison and cross-validation between simulated TDDFT/PBE0 spectra of: **(a)** Ag<sub>20</sub>/MgO(100)-reg and **(b)** Au<sub>20</sub>/MgO(100)-reg using the ORCA (blue curves) and ADF (red curves) codes.

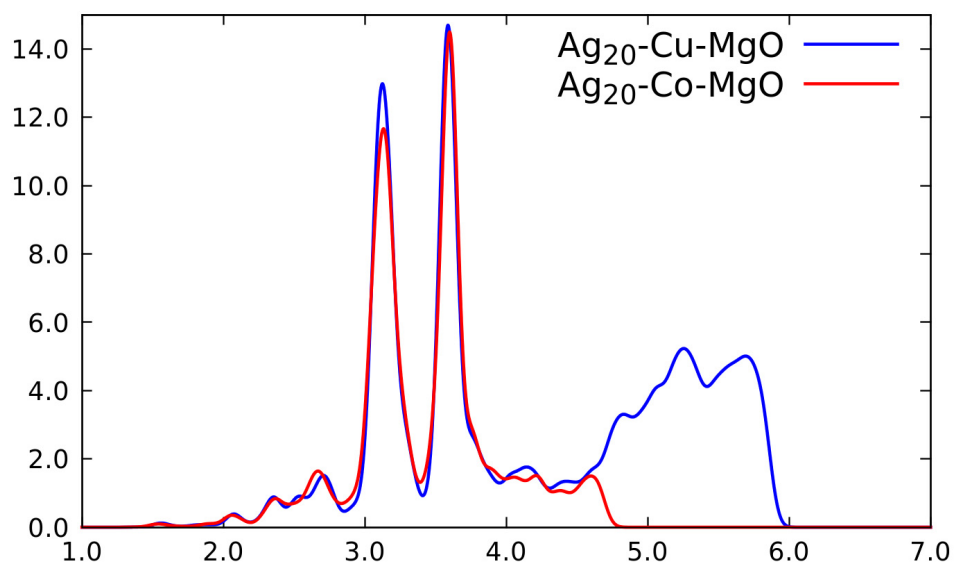

**Figure S5.** Comparison of the simulated TDDFT/PBE0 spectra of the  $\text{Ag}_{20}/\text{MgO}(100)\text{-Cu}$  and  $\text{Ag}_{20}/\text{MgO}(100)\text{-Co}$  systems using the ORCA code.

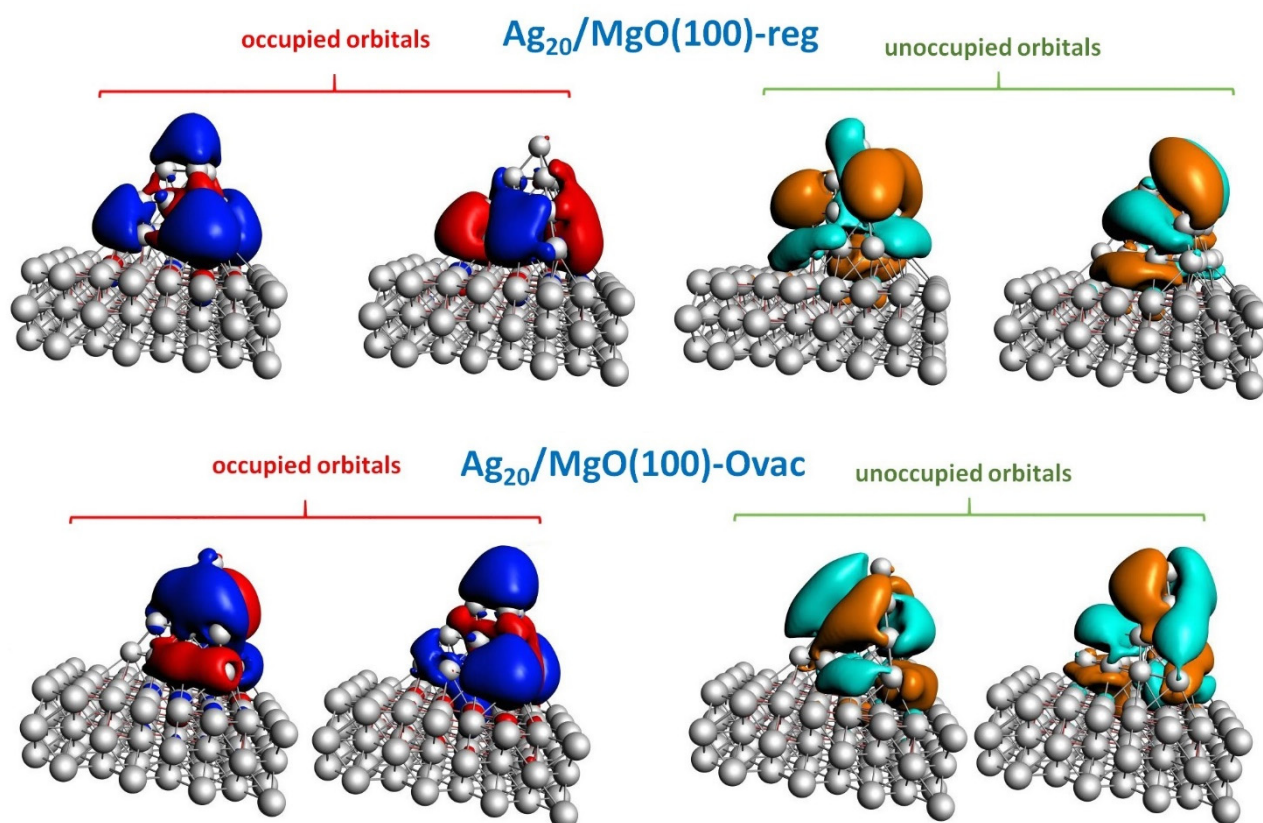

**Figure S6.** Contour plots of the Molecular Orbitals (MOs) of the  $\text{Ag}_{20}/\text{MgO}(100)\text{-reg}$  and  $\text{Ag}_{20}/\text{MgO}(100)\text{-Ovac}$  systems using the ADF code. Isosurfaces are set to contour values of  $0.01 \text{ \AA}^{-3/2}$ . These plots are taken for convenience of the reader and an easier comparison from Figure 5 and 7 of the main text.



### Cartesian Coordinates of Ag<sub>20</sub>

|    |               |               |               |
|----|---------------|---------------|---------------|
| Ag | 12.3958991179 | 11.5473929146 | 4.7281748462  |
| Ag | 7.8754293801  | 6.4852929482  | 7.0386373102  |
| Ag | 9.0761505122  | 7.9370688692  | 11.4802588934 |
| Ag | 10.2035449568 | 9.1722070953  | 9.2677468237  |
| Ag | 11.4000134546 | 10.2732181654 | 7.0154911060  |
| Ag | 9.5559946196  | 6.2969862465  | 9.3080685597  |
| Ag | 10.8276995161 | 7.5007804143  | 7.0653798507  |
| Ag | 11.9496922913 | 8.6617108323  | 4.7141059015  |
| Ag | 10.1020620637 | 4.7322919408  | 7.0919386765  |
| Ag | 11.1335426743 | 5.9710570758  | 4.7270860783  |
| Ag | 10.6525512583 | 3.1676720237  | 4.8062628672  |
| Ag | 7.4218354405  | 8.2337402897  | 9.2462405368  |
| Ag | 8.5443230426  | 9.6084881584  | 7.0343937609  |
| Ag | 9.7303919250  | 10.6419907038 | 4.7085952487  |
| Ag | 9.0613712363  | 7.8808521025  | 4.7484771911  |
| Ag | 8.4542963026  | 4.8926458450  | 4.7365496581  |
| Ag | 5.9055381979  | 8.4995170891  | 6.9399142908  |
| Ag | 6.9908674476  | 9.8961151119  | 4.6747076311  |
| Ag | 6.4515287570  | 6.7602949863  | 4.6353965236  |
| Ag | 4.4339503807  | 8.6308159158  | 4.6252353688  |

### Cartesian Coordinates of Ag<sub>20</sub>-MgO-reg

|    |               |               |               |
|----|---------------|---------------|---------------|
| Ag | 12.3979913721 | 11.5565295413 | 4.7249375968  |
| Ag | 7.8925217666  | 6.4711935264  | 7.0400656289  |
| Ag | 9.0829547090  | 7.8760760151  | 11.4753871443 |
| Ag | 10.2292159453 | 9.1562267530  | 9.2774686230  |
| Ag | 11.4114027970 | 10.2767609896 | 7.0191039576  |
| Ag | 9.5987598881  | 6.2850064522  | 9.2844774997  |
| Ag | 10.8083203672 | 7.5101567929  | 7.0348503147  |
| Ag | 11.9394535057 | 8.6762416628  | 4.7041176411  |
| Ag | 10.1205177814 | 4.7297259239  | 7.0566127275  |
| Ag | 11.0876798135 | 6.0049705717  | 4.6944785384  |
| Ag | 10.6648123018 | 3.1678504198  | 4.7832795980  |
| Ag | 7.4376007881  | 8.2235105749  | 9.2461906594  |
| Ag | 8.5787360485  | 9.6079443512  | 7.0446229423  |
| Ag | 9.7395715648  | 10.6397826265 | 4.7027060790  |
| Ag | 8.9739297613  | 7.8932009067  | 4.7214104813  |
| Ag | 8.4417224411  | 4.8512939685  | 4.7283547982  |
| Ag | 5.9326285272  | 8.4960690954  | 6.9354879865  |
| Ag | 6.9820726192  | 9.9927524973  | 4.7267171066  |
| Ag | 6.3889775970  | 6.6600932913  | 4.6890163671  |
| Ag | 4.4566458809  | 8.6298289643  | 4.6259978609  |
| Mg | 8.42200000    | 6.31650000    | 2.10550000    |
| Mg | 8.42200000    | 2.10550000    | 2.10550000    |
| Mg | 8.42200000    | 10.52750000   | 2.10550000    |
| Mg | 6.31650000    | 8.42200000    | 2.10550000    |
| Mg | 6.31650000    | 4.21100000    | 2.10550000    |
| Mg | 6.31650000    | 12.63300000   | 2.10550000    |
| Mg | 4.21100000    | 6.31650000    | 2.10550000    |

|    |             |             |            |
|----|-------------|-------------|------------|
| Mg | 4.21100000  | 2.10550000  | 2.10550000 |
| Mg | 4.21100000  | 10.52750000 | 2.10550000 |
| Mg | 2.10550000  | 8.42200000  | 2.10550000 |
| Mg | 2.10550000  | 4.21100000  | 2.10550000 |
| Mg | 2.10550000  | 12.63300000 | 2.10550000 |
| Mg | 12.63300000 | 6.31650000  | 2.10550000 |
| Mg | 12.63300000 | 2.10550000  | 2.10550000 |
| Mg | 12.63300000 | 10.52750000 | 2.10550000 |
| Mg | 10.52750000 | 8.42200000  | 2.10550000 |
| Mg | 10.52750000 | 4.21100000  | 2.10550000 |
| Mg | 10.52750000 | 12.63300000 | 2.10550000 |
| Mg | 8.42200000  | 8.42200000  | 0.00000000 |
| Mg | 8.42200000  | 4.21100000  | 0.00000000 |
| Mg | 8.42200000  | 12.63300000 | 0.00000000 |
| Mg | 6.31650000  | 6.31650000  | 0.00000000 |
| Mg | 6.31650000  | 2.10550000  | 0.00000000 |
| Mg | 6.31650000  | 10.52750000 | 0.00000000 |
| Mg | 4.21100000  | 8.42200000  | 0.00000000 |
| Mg | 4.21100000  | 4.21100000  | 0.00000000 |
| Mg | 4.21100000  | 12.63300000 | 0.00000000 |
| Mg | 2.10550000  | 6.31650000  | 0.00000000 |
| Mg | 2.10550000  | 2.10550000  | 0.00000000 |
| Mg | 2.10550000  | 10.52750000 | 0.00000000 |
| Mg | 12.63300000 | 8.42200000  | 0.00000000 |
| Mg | 12.63300000 | 4.21100000  | 0.00000000 |
| Mg | 12.63300000 | 12.63300000 | 0.00000000 |
| Mg | 10.52750000 | 6.31650000  | 0.00000000 |
| Mg | 10.52750000 | 2.10550000  | 0.00000000 |

|    |             |             |            |
|----|-------------|-------------|------------|
| Mg | 10.52750000 | 10.52750000 | 0.00000000 |
| O  | 8.42200000  | 8.42200000  | 2.10550000 |
| O  | 8.42200000  | 4.21100000  | 2.10550000 |
| O  | 8.42200000  | 12.63300000 | 2.10550000 |
| O  | 6.31650000  | 6.31650000  | 2.10550000 |
| O  | 6.31650000  | 2.10550000  | 2.10550000 |
| O  | 6.31650000  | 10.52750000 | 2.10550000 |
| O  | 4.21100000  | 8.42200000  | 2.10550000 |
| O  | 4.21100000  | 4.21100000  | 2.10550000 |
| O  | 4.21100000  | 12.63300000 | 2.10550000 |
| O  | 2.10550000  | 6.31650000  | 2.10550000 |
| O  | 2.10550000  | 2.10550000  | 2.10550000 |
| O  | 2.10550000  | 10.52750000 | 2.10550000 |
| O  | 12.63300000 | 8.42200000  | 2.10550000 |
| O  | 12.63300000 | 4.21100000  | 2.10550000 |
| O  | 12.63300000 | 12.63300000 | 2.10550000 |
| O  | 10.52750000 | 6.31650000  | 2.10550000 |
| O  | 10.52750000 | 2.10550000  | 2.10550000 |
| O  | 10.52750000 | 10.52750000 | 2.10550000 |
| O  | 8.42200000  | 6.31650000  | 0.00000000 |
| O  | 8.42200000  | 2.10550000  | 0.00000000 |
| O  | 8.42200000  | 10.52750000 | 0.00000000 |
| O  | 6.31650000  | 8.42200000  | 0.00000000 |
| O  | 6.31650000  | 4.21100000  | 0.00000000 |
| O  | 6.31650000  | 12.63300000 | 0.00000000 |
| O  | 4.21100000  | 6.31650000  | 0.00000000 |
| O  | 4.21100000  | 2.10550000  | 0.00000000 |
| O  | 4.21100000  | 10.52750000 | 0.00000000 |

- O 2.10550000 8.42200000 0.00000000
- O 2.10550000 4.21100000 0.00000000
- O 2.10550000 12.63300000 0.00000000
- O 12.63300000 6.31650000 0.00000000
- O 12.63300000 2.10550000 0.00000000
- O 12.63300000 10.52750000 0.00000000
- O 10.52750000 8.42200000 0.00000000
- O 10.52750000 4.21100000 0.00000000
- O 10.52750000 12.63300000 0.00000000

### Cartesian Coordinates of Ag<sub>20</sub>-MgO-Ovac

|    |               |               |               |
|----|---------------|---------------|---------------|
| Ag | 12.3277568321 | 11.5978026346 | 4.7279126344  |
| Ag | 8.0067547972  | 6.5564905693  | 6.9386243739  |
| Ag | 9.0630633533  | 7.8836780723  | 11.4983833167 |
| Ag | 10.1688756398 | 9.1862627495  | 9.2964889240  |
| Ag | 11.3204369602 | 10.3665619186 | 7.0524359611  |
| Ag | 9.6097281053  | 6.3008837080  | 9.2892585252  |
| Ag | 10.7530383496 | 7.5838349100  | 7.0395571689  |
| Ag | 11.7484290794 | 8.7872250986  | 4.7186010913  |
| Ag | 10.1876339279 | 4.7931424715  | 7.0433266342  |
| Ag | 10.7206579710 | 6.2070357329  | 4.6417252428  |
| Ag | 10.7484817669 | 3.2506815151  | 4.7765117359  |
| Ag | 7.4332715806  | 8.1624729502  | 9.2387352873  |
| Ag | 8.5365167178  | 9.5277760430  | 6.9923775693  |
| Ag | 9.6232796310  | 10.8392717355 | 4.7974589370  |
| Ag | 8.6647642443  | 8.2267754357  | 4.1651213695  |
| Ag | 8.3473098998  | 4.6656101699  | 4.8018336749  |
| Ag | 5.9298362864  | 8.4490885715  | 6.9226454506  |
| Ag | 6.8448502370  | 10.2476635281 | 4.8186340478  |
| Ag | 6.3798844395  | 6.5666955092  | 4.7061889814  |
| Ag | 4.5012821003  | 8.6240952811  | 4.6129706617  |
| Mg | 8.42200000    | 6.31650000    | 2.10550000    |
| Mg | 8.42200000    | 2.10550000    | 2.10550000    |
| Mg | 8.42200000    | 10.52750000   | 2.10550000    |
| Mg | 6.31650000    | 8.42200000    | 2.10550000    |
| Mg | 6.31650000    | 4.21100000    | 2.10550000    |
| Mg | 6.31650000    | 12.63300000   | 2.10550000    |
| Mg | 4.21100000    | 6.31650000    | 2.10550000    |

|    |             |             |            |
|----|-------------|-------------|------------|
| Mg | 4.21100000  | 2.10550000  | 2.10550000 |
| Mg | 4.21100000  | 10.52750000 | 2.10550000 |
| Mg | 2.10550000  | 8.42200000  | 2.10550000 |
| Mg | 2.10550000  | 4.21100000  | 2.10550000 |
| Mg | 2.10550000  | 12.63300000 | 2.10550000 |
| Mg | 12.63300000 | 6.31650000  | 2.10550000 |
| Mg | 12.63300000 | 2.10550000  | 2.10550000 |
| Mg | 12.63300000 | 10.52750000 | 2.10550000 |
| Mg | 10.52750000 | 8.42200000  | 2.10550000 |
| Mg | 10.52750000 | 4.21100000  | 2.10550000 |
| Mg | 10.52750000 | 12.63300000 | 2.10550000 |
| Mg | 8.42200000  | 8.42200000  | 0.00000000 |
| Mg | 8.42200000  | 4.21100000  | 0.00000000 |
| Mg | 8.42200000  | 12.63300000 | 0.00000000 |
| Mg | 6.31650000  | 6.31650000  | 0.00000000 |
| Mg | 6.31650000  | 2.10550000  | 0.00000000 |
| Mg | 6.31650000  | 10.52750000 | 0.00000000 |
| Mg | 4.21100000  | 8.42200000  | 0.00000000 |
| Mg | 4.21100000  | 4.21100000  | 0.00000000 |
| Mg | 4.21100000  | 12.63300000 | 0.00000000 |
| Mg | 2.10550000  | 6.31650000  | 0.00000000 |
| Mg | 2.10550000  | 2.10550000  | 0.00000000 |
| Mg | 2.10550000  | 10.52750000 | 0.00000000 |
| Mg | 12.63300000 | 8.42200000  | 0.00000000 |
| Mg | 12.63300000 | 4.21100000  | 0.00000000 |
| Mg | 12.63300000 | 12.63300000 | 0.00000000 |
| Mg | 10.52750000 | 6.31650000  | 0.00000000 |
| Mg | 10.52750000 | 2.10550000  | 0.00000000 |

|    |             |             |            |
|----|-------------|-------------|------------|
| Mg | 10.52750000 | 10.52750000 | 0.00000000 |
| O  | 8.42200000  | 4.21100000  | 2.10550000 |
| O  | 8.42200000  | 12.63300000 | 2.10550000 |
| O  | 6.31650000  | 6.31650000  | 2.10550000 |
| O  | 6.31650000  | 2.10550000  | 2.10550000 |
| O  | 6.31650000  | 10.52750000 | 2.10550000 |
| O  | 4.21100000  | 8.42200000  | 2.10550000 |
| O  | 4.21100000  | 4.21100000  | 2.10550000 |
| O  | 4.21100000  | 12.63300000 | 2.10550000 |
| O  | 2.10550000  | 6.31650000  | 2.10550000 |
| O  | 2.10550000  | 2.10550000  | 2.10550000 |
| O  | 2.10550000  | 10.52750000 | 2.10550000 |
| O  | 12.63300000 | 8.42200000  | 2.10550000 |
| O  | 12.63300000 | 4.21100000  | 2.10550000 |
| O  | 12.63300000 | 12.63300000 | 2.10550000 |
| O  | 10.52750000 | 6.31650000  | 2.10550000 |
| O  | 10.52750000 | 2.10550000  | 2.10550000 |
| O  | 10.52750000 | 10.52750000 | 2.10550000 |
| O  | 8.42200000  | 6.31650000  | 0.00000000 |
| O  | 8.42200000  | 2.10550000  | 0.00000000 |
| O  | 8.42200000  | 10.52750000 | 0.00000000 |
| O  | 6.31650000  | 8.42200000  | 0.00000000 |
| O  | 6.31650000  | 4.21100000  | 0.00000000 |
| O  | 6.31650000  | 12.63300000 | 0.00000000 |
| O  | 4.21100000  | 6.31650000  | 0.00000000 |
| O  | 4.21100000  | 2.10550000  | 0.00000000 |
| O  | 4.21100000  | 10.52750000 | 0.00000000 |
| O  | 2.10550000  | 8.42200000  | 0.00000000 |



- O 2.10550000 4.21100000 0.00000000
- O 2.10550000 12.63300000 0.00000000
- O 12.63300000 6.31650000 0.00000000
- O 12.63300000 2.10550000 0.00000000
- O 12.63300000 10.52750000 0.00000000
- O 10.52750000 8.42200000 0.00000000
- O 10.52750000 4.21100000 0.00000000
- O 10.52750000 12.63300000 0.00000000

### Cartesian Coordinates of Ag<sub>20</sub>-MgO-Cu

|    |               |               |               |
|----|---------------|---------------|---------------|
| Ag | 12.3958991179 | 11.5473929146 | 4.7281748462  |
| Ag | 7.8754293801  | 6.4852929482  | 7.0386373102  |
| Ag | 9.0761505122  | 7.9370688692  | 11.4802588934 |
| Ag | 10.2035449568 | 9.1722070953  | 9.2677468237  |
| Ag | 11.4000134546 | 10.2732181654 | 7.0154911060  |
| Ag | 9.5559946196  | 6.2969862465  | 9.3080685597  |
| Ag | 10.8276995161 | 7.5007804143  | 7.0653798507  |
| Ag | 11.9496922913 | 8.6617108323  | 4.7141059015  |
| Ag | 10.1020620637 | 4.7322919408  | 7.0919386765  |
| Ag | 11.1335426743 | 5.9710570758  | 4.7270860783  |
| Ag | 10.6525512583 | 3.1676720237  | 4.8062628672  |
| Ag | 7.4218354405  | 8.2337402897  | 9.2462405368  |
| Ag | 8.5443230426  | 9.6084881584  | 7.0343937609  |
| Ag | 9.7303919250  | 10.6419907038 | 4.7085952487  |
| Ag | 9.0613712363  | 7.8808521025  | 4.7484771911  |
| Ag | 8.4542963026  | 4.8926458450  | 4.7365496581  |
| Ag | 5.9055381979  | 8.4995170891  | 6.9399142908  |
| Ag | 6.9908674476  | 9.8961151119  | 4.6747076311  |
| Ag | 6.4515287570  | 6.7602949863  | 4.6353965236  |
| Ag | 4.4339503807  | 8.6308159158  | 4.6252353688  |
| Mg | 8.42200000    | 6.31650000    | 2.10550000    |
| Mg | 8.42200000    | 2.10550000    | 2.10550000    |
| Mg | 8.42200000    | 10.52750000   | 2.10550000    |
| Cu | 6.31650000    | 8.42200000    | 2.10550000    |
| Mg | 6.31650000    | 4.21100000    | 2.10550000    |
| Mg | 6.31650000    | 12.63300000   | 2.10550000    |
| Mg | 4.21100000    | 6.31650000    | 2.10550000    |

|    |             |             |            |
|----|-------------|-------------|------------|
| Mg | 4.21100000  | 2.10550000  | 2.10550000 |
| Mg | 4.21100000  | 10.52750000 | 2.10550000 |
| Mg | 2.10550000  | 8.42200000  | 2.10550000 |
| Mg | 2.10550000  | 4.21100000  | 2.10550000 |
| Mg | 2.10550000  | 12.63300000 | 2.10550000 |
| Mg | 12.63300000 | 6.31650000  | 2.10550000 |
| Mg | 12.63300000 | 2.10550000  | 2.10550000 |
| Mg | 12.63300000 | 10.52750000 | 2.10550000 |
| Mg | 10.52750000 | 8.42200000  | 2.10550000 |
| Mg | 10.52750000 | 4.21100000  | 2.10550000 |
| Mg | 10.52750000 | 12.63300000 | 2.10550000 |
| Mg | 8.42200000  | 8.42200000  | 0.00000000 |
| Mg | 8.42200000  | 4.21100000  | 0.00000000 |
| Mg | 8.42200000  | 12.63300000 | 0.00000000 |
| Mg | 6.31650000  | 6.31650000  | 0.00000000 |
| Mg | 6.31650000  | 2.10550000  | 0.00000000 |
| Mg | 6.31650000  | 10.52750000 | 0.00000000 |
| Mg | 4.21100000  | 8.42200000  | 0.00000000 |
| Mg | 4.21100000  | 4.21100000  | 0.00000000 |
| Mg | 4.21100000  | 12.63300000 | 0.00000000 |
| Mg | 2.10550000  | 6.31650000  | 0.00000000 |
| Mg | 2.10550000  | 2.10550000  | 0.00000000 |
| Mg | 2.10550000  | 10.52750000 | 0.00000000 |
| Mg | 12.63300000 | 8.42200000  | 0.00000000 |
| Mg | 12.63300000 | 4.21100000  | 0.00000000 |
| Mg | 12.63300000 | 12.63300000 | 0.00000000 |
| Mg | 10.52750000 | 6.31650000  | 0.00000000 |
| Mg | 10.52750000 | 2.10550000  | 0.00000000 |

|    |             |             |            |
|----|-------------|-------------|------------|
| Mg | 10.52750000 | 10.52750000 | 0.00000000 |
| O  | 8.42200000  | 8.42200000  | 2.10550000 |
| O  | 8.42200000  | 4.21100000  | 2.10550000 |
| O  | 8.42200000  | 12.63300000 | 2.10550000 |
| O  | 6.31650000  | 6.31650000  | 2.10550000 |
| O  | 6.31650000  | 2.10550000  | 2.10550000 |
| O  | 6.31650000  | 10.52750000 | 2.10550000 |
| O  | 4.21100000  | 8.42200000  | 2.10550000 |
| O  | 4.21100000  | 4.21100000  | 2.10550000 |
| O  | 4.21100000  | 12.63300000 | 2.10550000 |
| O  | 2.10550000  | 6.31650000  | 2.10550000 |
| O  | 2.10550000  | 2.10550000  | 2.10550000 |
| O  | 2.10550000  | 10.52750000 | 2.10550000 |
| O  | 12.63300000 | 8.42200000  | 2.10550000 |
| O  | 12.63300000 | 4.21100000  | 2.10550000 |
| O  | 12.63300000 | 12.63300000 | 2.10550000 |
| O  | 10.52750000 | 6.31650000  | 2.10550000 |
| O  | 10.52750000 | 2.10550000  | 2.10550000 |
| O  | 10.52750000 | 10.52750000 | 2.10550000 |
| O  | 8.42200000  | 6.31650000  | 0.00000000 |
| O  | 8.42200000  | 2.10550000  | 0.00000000 |
| O  | 8.42200000  | 10.52750000 | 0.00000000 |
| O  | 6.31650000  | 8.42200000  | 0.00000000 |
| O  | 6.31650000  | 4.21100000  | 0.00000000 |
| O  | 6.31650000  | 12.63300000 | 0.00000000 |
| O  | 4.21100000  | 6.31650000  | 0.00000000 |
| O  | 4.21100000  | 2.10550000  | 0.00000000 |
| O  | 4.21100000  | 10.52750000 | 0.00000000 |

- O 2.10550000 8.42200000 0.00000000
- O 2.10550000 4.21100000 0.00000000
- O 2.10550000 12.63300000 0.00000000
- O 12.63300000 6.31650000 0.00000000
- O 12.63300000 2.10550000 0.00000000
- O 12.63300000 10.52750000 0.00000000
- O 10.52750000 8.42200000 0.00000000
- O 10.52750000 4.21100000 0.00000000
- O 10.52750000 12.63300000 0.00000000

### Cartesian Coordinates of Ag<sub>20</sub>-MgO-Ovac-Cu

|    |               |               |               |
|----|---------------|---------------|---------------|
| Ag | 12.3281959739 | 11.5899243196 | 4.7261143136  |
| Ag | 7.9683555962  | 6.5369863672  | 6.8896622037  |
| Ag | 8.9974721170  | 7.8780194689  | 11.4570307501 |
| Ag | 10.1054842218 | 9.1966945785  | 9.2686376628  |
| Ag | 11.2970652441 | 10.3610507291 | 7.0375639030  |
| Ag | 9.5498564027  | 6.2915319848  | 9.2597817495  |
| Ag | 10.7472185824 | 7.5752259485  | 7.0456080298  |
| Ag | 11.7620322596 | 8.7754141528  | 4.7207585259  |
| Ag | 10.1724993303 | 4.7830954968  | 7.0309688804  |
| Ag | 10.7407683475 | 6.1842788325  | 4.6465212189  |
| Ag | 10.7517625022 | 3.2470576944  | 4.7622924465  |
| Ag | 7.3944684012  | 8.1584538335  | 9.1657571536  |
| Ag | 8.5021195049  | 9.5371120417  | 6.9510868141  |
| Ag | 9.6237275339  | 10.8233929695 | 4.7606222568  |
| Ag | 8.7029881840  | 8.1731759657  | 4.2470613034  |
| Ag | 8.3444221294  | 4.6508975392  | 4.7783818100  |
| Ag | 5.9023636887  | 8.4428673275  | 6.8343468764  |
| Ag | 6.8415856484  | 10.1901316425 | 4.7078600017  |
| Ag | 6.3883275330  | 6.5758391067  | 4.6161382019  |
| Ag | 4.5008427269  | 8.6100284422  | 4.5176769224  |
| Mg | 8.42200000    | 6.31650000    | 2.10550000    |
| Mg | 8.42200000    | 2.10550000    | 2.10550000    |
| Mg | 8.42200000    | 10.52750000   | 2.10550000    |
| Cu | 6.31650000    | 8.42200000    | 2.10550000    |
| Mg | 6.31650000    | 4.21100000    | 2.10550000    |
| Mg | 6.31650000    | 12.63300000   | 2.10550000    |
| Mg | 4.21100000    | 6.31650000    | 2.10550000    |

|    |             |             |            |
|----|-------------|-------------|------------|
| Mg | 4.21100000  | 2.10550000  | 2.10550000 |
| Mg | 4.21100000  | 10.52750000 | 2.10550000 |
| Mg | 2.10550000  | 8.42200000  | 2.10550000 |
| Mg | 2.10550000  | 4.21100000  | 2.10550000 |
| Mg | 2.10550000  | 12.63300000 | 2.10550000 |
| Mg | 12.63300000 | 6.31650000  | 2.10550000 |
| Mg | 12.63300000 | 2.10550000  | 2.10550000 |
| Mg | 12.63300000 | 10.52750000 | 2.10550000 |
| Mg | 10.52750000 | 8.42200000  | 2.10550000 |
| Mg | 10.52750000 | 4.21100000  | 2.10550000 |
| Mg | 10.52750000 | 12.63300000 | 2.10550000 |
| Mg | 8.42200000  | 8.42200000  | 0.00000000 |
| Mg | 8.42200000  | 4.21100000  | 0.00000000 |
| Mg | 8.42200000  | 12.63300000 | 0.00000000 |
| Mg | 6.31650000  | 6.31650000  | 0.00000000 |
| Mg | 6.31650000  | 2.10550000  | 0.00000000 |
| Mg | 6.31650000  | 10.52750000 | 0.00000000 |
| Mg | 4.21100000  | 8.42200000  | 0.00000000 |
| Mg | 4.21100000  | 4.21100000  | 0.00000000 |
| Mg | 4.21100000  | 12.63300000 | 0.00000000 |
| Mg | 2.10550000  | 6.31650000  | 0.00000000 |
| Mg | 2.10550000  | 2.10550000  | 0.00000000 |
| Mg | 2.10550000  | 10.52750000 | 0.00000000 |
| Mg | 12.63300000 | 8.42200000  | 0.00000000 |
| Mg | 12.63300000 | 4.21100000  | 0.00000000 |
| Mg | 12.63300000 | 12.63300000 | 0.00000000 |
| Mg | 10.52750000 | 6.31650000  | 0.00000000 |
| Mg | 10.52750000 | 2.10550000  | 0.00000000 |

|    |             |             |            |
|----|-------------|-------------|------------|
| Mg | 10.52750000 | 10.52750000 | 0.00000000 |
| O  | 8.42200000  | 4.21100000  | 2.10550000 |
| O  | 8.42200000  | 12.63300000 | 2.10550000 |
| O  | 6.31650000  | 6.31650000  | 2.10550000 |
| O  | 6.31650000  | 2.10550000  | 2.10550000 |
| O  | 6.31650000  | 10.52750000 | 2.10550000 |
| O  | 4.21100000  | 8.42200000  | 2.10550000 |
| O  | 4.21100000  | 4.21100000  | 2.10550000 |
| O  | 4.21100000  | 12.63300000 | 2.10550000 |
| O  | 2.10550000  | 6.31650000  | 2.10550000 |
| O  | 2.10550000  | 2.10550000  | 2.10550000 |
| O  | 2.10550000  | 10.52750000 | 2.10550000 |
| O  | 12.63300000 | 8.42200000  | 2.10550000 |
| O  | 12.63300000 | 4.21100000  | 2.10550000 |
| O  | 12.63300000 | 12.63300000 | 2.10550000 |
| O  | 10.52750000 | 6.31650000  | 2.10550000 |
| O  | 10.52750000 | 2.10550000  | 2.10550000 |
| O  | 10.52750000 | 10.52750000 | 2.10550000 |
| O  | 8.42200000  | 6.31650000  | 0.00000000 |
| O  | 8.42200000  | 2.10550000  | 0.00000000 |
| O  | 8.42200000  | 10.52750000 | 0.00000000 |
| O  | 6.31650000  | 8.42200000  | 0.00000000 |
| O  | 6.31650000  | 4.21100000  | 0.00000000 |
| O  | 6.31650000  | 12.63300000 | 0.00000000 |
| O  | 4.21100000  | 6.31650000  | 0.00000000 |
| O  | 4.21100000  | 2.10550000  | 0.00000000 |
| O  | 4.21100000  | 10.52750000 | 0.00000000 |
| O  | 2.10550000  | 8.42200000  | 0.00000000 |



- O 2.10550000 4.21100000 0.00000000
- O 2.10550000 12.63300000 0.00000000
- O 12.63300000 6.31650000 0.00000000
- O 12.63300000 2.10550000 0.00000000
- O 12.63300000 10.52750000 0.00000000
- O 10.52750000 8.42200000 0.00000000
- O 10.52750000 4.21100000 0.00000000
- O 10.52750000 12.63300000 0.00000000

### Cartesian Coordinates of Au<sub>20</sub>

|    |               |               |               |
|----|---------------|---------------|---------------|
| Au | 12.3460935116 | 11.5190580511 | 4.6867969349  |
| Au | 7.8236578162  | 6.1850310359  | 7.0773789245  |
| Au | 9.2106764929  | 7.8216562807  | 11.3199023559 |
| Au | 10.3621009817 | 9.1543816284  | 9.1879013981  |
| Au | 11.5032587579 | 10.2478241040 | 6.9811559204  |
| Au | 9.7189611204  | 6.1478985527  | 9.2049728880  |
| Au | 11.1740183290 | 7.4087286676  | 7.1105254684  |
| Au | 12.0819823566 | 8.5882730840  | 4.6793285251  |
| Au | 10.2551304182 | 4.6081228480  | 7.0610991194  |
| Au | 11.4194991010 | 5.9138720198  | 4.7590757252  |
| Au | 10.7604737036 | 3.1582445842  | 4.7482489440  |
| Au | 7.4681846166  | 8.0852345617  | 9.1719652961  |
| Au | 8.5544334422  | 9.6304002089  | 7.0664180586  |
| Au | 9.7108853613  | 10.5368050300 | 4.6820449990  |
| Au | 9.1614991231  | 7.7035806976  | 4.8930857221  |
| Au | 8.4855955492  | 4.7619337658  | 4.7193463130  |
| Au | 5.8949555649  | 8.3494952425  | 6.9824705008  |
| Au | 7.0592263836  | 9.7658600525  | 4.6911465272  |
| Au | 6.4588988185  | 6.5689948581  | 4.6722511394  |
| Au | 4.5096641775  | 8.5480064635  | 4.6457902380  |

### Cartesian Coordinates of Au<sub>20</sub>-MgO-reg

|    |               |               |               |
|----|---------------|---------------|---------------|
| Au | 12.3734027783 | 11.5257531985 | 4.6874188567  |
| Au | 7.8470072026  | 6.1772969422  | 7.0754816392  |
| Au | 9.2178775848  | 7.8236365575  | 11.3172113048 |
| Au | 10.4060380981 | 9.1483912655  | 9.1997956439  |
| Au | 11.5269792237 | 10.2568375893 | 6.9840123346  |
| Au | 9.7351162778  | 6.1496385694  | 9.2034503117  |
| Au | 11.1444507650 | 7.4206166090  | 7.0825207333  |
| Au | 12.0759143840 | 8.5966858940  | 4.6722027038  |
| Au | 10.2737955752 | 4.6075897645  | 7.0593681504  |
| Au | 11.3226316534 | 5.9425881827  | 4.7216707463  |
| Au | 10.7690490315 | 3.1560489255  | 4.7461022280  |
| Au | 7.4820091423  | 8.0907345550  | 9.1669729643  |
| Au | 8.6067959954  | 9.6447355279  | 7.0833390114  |
| Au | 9.7431891583  | 10.5591142279 | 4.6791566744  |
| Au | 9.0918056825  | 7.7456880128  | 4.8610407055  |
| Au | 8.4817405058  | 4.7332756869  | 4.7223590879  |
| Au | 5.9523834298  | 8.3651932344  | 6.9525313208  |
| Au | 7.0693029287  | 9.8995554550  | 4.7420597005  |
| Au | 6.4378938170  | 6.5158520162  | 4.6895828205  |
| Au | 4.5702034916  | 8.5722156367  | 4.6188215925  |
| Mg | 8.42200000    | 6.31650000    | 2.10550000    |
| Mg | 8.42200000    | 2.10550000    | 2.10550000    |
| Mg | 8.42200000    | 10.52750000   | 2.10550000    |
| Mg | 6.31650000    | 8.42200000    | 2.10550000    |
| Mg | 6.31650000    | 4.21100000    | 2.10550000    |
| Mg | 6.31650000    | 12.63300000   | 2.10550000    |
| Mg | 4.21100000    | 6.31650000    | 2.10550000    |

|    |             |             |            |
|----|-------------|-------------|------------|
| Mg | 4.21100000  | 2.10550000  | 2.10550000 |
| Mg | 4.21100000  | 10.52750000 | 2.10550000 |
| Mg | 2.10550000  | 8.42200000  | 2.10550000 |
| Mg | 2.10550000  | 4.21100000  | 2.10550000 |
| Mg | 2.10550000  | 12.63300000 | 2.10550000 |
| Mg | 12.63300000 | 6.31650000  | 2.10550000 |
| Mg | 12.63300000 | 2.10550000  | 2.10550000 |
| Mg | 12.63300000 | 10.52750000 | 2.10550000 |
| Mg | 10.52750000 | 8.42200000  | 2.10550000 |
| Mg | 10.52750000 | 4.21100000  | 2.10550000 |
| Mg | 10.52750000 | 12.63300000 | 2.10550000 |
| Mg | 8.42200000  | 8.42200000  | 0.00000000 |
| Mg | 8.42200000  | 4.21100000  | 0.00000000 |
| Mg | 8.42200000  | 12.63300000 | 0.00000000 |
| Mg | 6.31650000  | 6.31650000  | 0.00000000 |
| Mg | 6.31650000  | 2.10550000  | 0.00000000 |
| Mg | 6.31650000  | 10.52750000 | 0.00000000 |
| Mg | 4.21100000  | 8.42200000  | 0.00000000 |
| Mg | 4.21100000  | 4.21100000  | 0.00000000 |
| Mg | 4.21100000  | 12.63300000 | 0.00000000 |
| Mg | 2.10550000  | 6.31650000  | 0.00000000 |
| Mg | 2.10550000  | 2.10550000  | 0.00000000 |
| Mg | 2.10550000  | 10.52750000 | 0.00000000 |
| Mg | 12.63300000 | 8.42200000  | 0.00000000 |
| Mg | 12.63300000 | 4.21100000  | 0.00000000 |
| Mg | 12.63300000 | 12.63300000 | 0.00000000 |
| Mg | 10.52750000 | 6.31650000  | 0.00000000 |
| Mg | 10.52750000 | 2.10550000  | 0.00000000 |

|    |             |             |            |
|----|-------------|-------------|------------|
| Mg | 10.52750000 | 10.52750000 | 0.00000000 |
| O  | 8.42200000  | 8.42200000  | 2.10550000 |
| O  | 8.42200000  | 4.21100000  | 2.10550000 |
| O  | 8.42200000  | 12.63300000 | 2.10550000 |
| O  | 6.31650000  | 6.31650000  | 2.10550000 |
| O  | 6.31650000  | 2.10550000  | 2.10550000 |
| O  | 6.31650000  | 10.52750000 | 2.10550000 |
| O  | 4.21100000  | 8.42200000  | 2.10550000 |
| O  | 4.21100000  | 4.21100000  | 2.10550000 |
| O  | 4.21100000  | 12.63300000 | 2.10550000 |
| O  | 2.10550000  | 6.31650000  | 2.10550000 |
| O  | 2.10550000  | 2.10550000  | 2.10550000 |
| O  | 2.10550000  | 10.52750000 | 2.10550000 |
| O  | 12.63300000 | 8.42200000  | 2.10550000 |
| O  | 12.63300000 | 4.21100000  | 2.10550000 |
| O  | 12.63300000 | 12.63300000 | 2.10550000 |
| O  | 10.52750000 | 6.31650000  | 2.10550000 |
| O  | 10.52750000 | 2.10550000  | 2.10550000 |
| O  | 10.52750000 | 10.52750000 | 2.10550000 |
| O  | 8.42200000  | 6.31650000  | 0.00000000 |
| O  | 8.42200000  | 2.10550000  | 0.00000000 |
| O  | 8.42200000  | 10.52750000 | 0.00000000 |
| O  | 6.31650000  | 8.42200000  | 0.00000000 |
| O  | 6.31650000  | 4.21100000  | 0.00000000 |
| O  | 6.31650000  | 12.63300000 | 0.00000000 |
| O  | 4.21100000  | 6.31650000  | 0.00000000 |
| O  | 4.21100000  | 2.10550000  | 0.00000000 |
| O  | 4.21100000  | 10.52750000 | 0.00000000 |

- O 2.10550000 8.42200000 0.00000000
- O 2.10550000 4.21100000 0.00000000
- O 2.10550000 12.63300000 0.00000000
- O 12.63300000 6.31650000 0.00000000
- O 12.63300000 2.10550000 0.00000000
- O 12.63300000 10.52750000 0.00000000
- O 10.52750000 8.42200000 0.00000000
- O 10.52750000 4.21100000 0.00000000
- O 10.52750000 12.63300000 0.00000000

### Cartesian Coordinates of Au<sub>20</sub>-MgO-Ovac

|    |               |               |               |
|----|---------------|---------------|---------------|
| Au | 12.1983964867 | 11.5669418615 | 4.7326687300  |
| Au | 7.7702356225  | 6.2700941182  | 7.0491017794  |
| Au | 9.0932662632  | 7.8044988202  | 11.3726123783 |
| Au | 10.2247852973 | 9.2277178484  | 9.2922830959  |
| Au | 11.3191267162 | 10.4025073413 | 7.0989372861  |
| Au | 9.5800945187  | 6.0945369345  | 9.2632368372  |
| Au | 10.6033147101 | 7.5489476199  | 7.0436786517  |
| Au | 11.6263504638 | 8.7667444877  | 4.7501319967  |
| Au | 10.1506377811 | 4.6444300179  | 7.0462775591  |
| Au | 10.6680927081 | 6.2188484669  | 4.6630734384  |
| Au | 10.6201927058 | 3.2012615396  | 4.7409229862  |
| Au | 7.3746703391  | 8.0888264409  | 9.2069135052  |
| Au | 8.4631813187  | 9.6082239559  | 7.0786600253  |
| Au | 9.4636625439  | 10.9636209395 | 4.8709762797  |
| Au | 8.4787738131  | 8.3458841699  | 3.7773493780  |
| Au | 8.2334194887  | 4.6392960145  | 4.7879960302  |
| Au | 5.8549315679  | 8.4320837892  | 6.9759383852  |
| Au | 6.7873337475  | 10.3346994922 | 4.9427845606  |
| Au | 6.3230549154  | 6.5366768951  | 4.7437002339  |
| Au | 4.5282215315  | 8.6684027697  | 4.6211152639  |
| Mg | 8.42200000    | 6.31650000    | 2.10550000    |
| Mg | 8.42200000    | 2.10550000    | 2.10550000    |
| Mg | 8.42200000    | 10.52750000   | 2.10550000    |
| Mg | 6.31650000    | 8.42200000    | 2.10550000    |
| Mg | 6.31650000    | 4.21100000    | 2.10550000    |
| Mg | 6.31650000    | 12.63300000   | 2.10550000    |
| Mg | 4.21100000    | 6.31650000    | 2.10550000    |

|    |             |             |            |
|----|-------------|-------------|------------|
| Mg | 4.21100000  | 2.10550000  | 2.10550000 |
| Mg | 4.21100000  | 10.52750000 | 2.10550000 |
| Mg | 2.10550000  | 8.42200000  | 2.10550000 |
| Mg | 2.10550000  | 4.21100000  | 2.10550000 |
| Mg | 2.10550000  | 12.63300000 | 2.10550000 |
| Mg | 12.63300000 | 6.31650000  | 2.10550000 |
| Mg | 12.63300000 | 2.10550000  | 2.10550000 |
| Mg | 12.63300000 | 10.52750000 | 2.10550000 |
| Mg | 10.52750000 | 8.42200000  | 2.10550000 |
| Mg | 10.52750000 | 4.21100000  | 2.10550000 |
| Mg | 10.52750000 | 12.63300000 | 2.10550000 |
| Mg | 8.42200000  | 8.42200000  | 0.00000000 |
| Mg | 8.42200000  | 4.21100000  | 0.00000000 |
| Mg | 8.42200000  | 12.63300000 | 0.00000000 |
| Mg | 6.31650000  | 6.31650000  | 0.00000000 |
| Mg | 6.31650000  | 2.10550000  | 0.00000000 |
| Mg | 6.31650000  | 10.52750000 | 0.00000000 |
| Mg | 4.21100000  | 8.42200000  | 0.00000000 |
| Mg | 4.21100000  | 4.21100000  | 0.00000000 |
| Mg | 4.21100000  | 12.63300000 | 0.00000000 |
| Mg | 2.10550000  | 6.31650000  | 0.00000000 |
| Mg | 2.10550000  | 2.10550000  | 0.00000000 |
| Mg | 2.10550000  | 10.52750000 | 0.00000000 |
| Mg | 12.63300000 | 8.42200000  | 0.00000000 |
| Mg | 12.63300000 | 4.21100000  | 0.00000000 |
| Mg | 12.63300000 | 12.63300000 | 0.00000000 |
| Mg | 10.52750000 | 6.31650000  | 0.00000000 |
| Mg | 10.52750000 | 2.10550000  | 0.00000000 |



|    |             |             |            |
|----|-------------|-------------|------------|
| Mg | 10.52750000 | 10.52750000 | 0.00000000 |
| O  | 8.42200000  | 4.21100000  | 2.10550000 |
| O  | 8.42200000  | 12.63300000 | 2.10550000 |
| O  | 6.31650000  | 6.31650000  | 2.10550000 |
| O  | 6.31650000  | 2.10550000  | 2.10550000 |
| O  | 6.31650000  | 10.52750000 | 2.10550000 |
| O  | 4.21100000  | 8.42200000  | 2.10550000 |
| O  | 4.21100000  | 4.21100000  | 2.10550000 |
| O  | 4.21100000  | 12.63300000 | 2.10550000 |
| O  | 2.10550000  | 6.31650000  | 2.10550000 |
| O  | 2.10550000  | 2.10550000  | 2.10550000 |
| O  | 2.10550000  | 10.52750000 | 2.10550000 |
| O  | 12.63300000 | 8.42200000  | 2.10550000 |
| O  | 12.63300000 | 4.21100000  | 2.10550000 |
| O  | 12.63300000 | 12.63300000 | 2.10550000 |
| O  | 10.52750000 | 6.31650000  | 2.10550000 |
| O  | 10.52750000 | 2.10550000  | 2.10550000 |
| O  | 10.52750000 | 10.52750000 | 2.10550000 |
| O  | 8.42200000  | 6.31650000  | 0.00000000 |
| O  | 8.42200000  | 2.10550000  | 0.00000000 |
| O  | 8.42200000  | 10.52750000 | 0.00000000 |
| O  | 6.31650000  | 8.42200000  | 0.00000000 |
| O  | 6.31650000  | 4.21100000  | 0.00000000 |
| O  | 6.31650000  | 12.63300000 | 0.00000000 |
| O  | 4.21100000  | 6.31650000  | 0.00000000 |
| O  | 4.21100000  | 2.10550000  | 0.00000000 |
| O  | 4.21100000  | 10.52750000 | 0.00000000 |
| O  | 2.10550000  | 8.42200000  | 0.00000000 |

- O 2.10550000 4.21100000 0.00000000
- O 2.10550000 12.63300000 0.00000000
- O 12.63300000 6.31650000 0.00000000
- O 12.63300000 2.10550000 0.00000000
- O 12.63300000 10.52750000 0.00000000
- O 10.52750000 8.42200000 0.00000000
- O 10.52750000 4.21100000 0.00000000
- O 10.52750000 12.63300000 0.00000000
